# Supplementary material for: New ionic dinuclear Ir(iii) Schiff base complexes with aggregation-induced phosphorescent emission (AIPE)
Source: Royal Society of Chemistry journal article supplement (doi:10.1039/c4cc01799d), 2014-05-23
Supplement: c4cc01799d1.pdf [file c4cc01799d1.pdf]

## Supporting Information

### New ionic dinuclear Ir(III) complexes with aggregation-induced phosphorescent emission (AIPE)

Guangfu Li<sup>a</sup>, Yong Wu<sup>a</sup>, Guogang Shan<sup>a</sup>, Weilong Che<sup>a</sup>, Dongxia Zhu<sup>\*a</sup>, Baiqiao Song<sup>a</sup>, Likai Yan<sup>\*a</sup>, Zhongmin Su<sup>a</sup>, Martin R. Bryce<sup>\*b</sup>

<sup>a</sup>*Institute of Functional Material Chemistry, Faculty of Chemistry, Northeast Normal University, Changchun 130024, People's Republic of China; Fax: +86-0431-85684009  
Tel.: +86-431-85099108, E-mail: zhudx047@nenu.edu.cn; yanlk924@nenu.edu.cn*

<sup>b</sup>*Department of Chemistry, Durham University, Durham, DH1 3LE, UK  
E-mail: m.r.bryce@durham.ac.uk*

### Table of Contents

1. Experimental - general information
2. Ancillary ligands, complex **1** and complex **2** - synthesis and characterisation
3. <sup>1</sup>H NMR, <sup>13</sup>C NMR and 2D NMR spectra of complexes **1** and **2** at room temperature
4. X-ray crystallographic data
5. Electrochemical data
6. Photophysical properties
7. Quantum Chemical Calculations
8. References

## 1. Experimental - general information

Materials obtained from commercial suppliers were used without further purification unless otherwise stated. All glassware, syringes, magnetic stirring bars, and needles were thoroughly dried in a convection oven. Reactions were monitored using thin layer chromatography (TLC). Commercial TLC plates were used and the spots were visualised under UV light at 254 and 365 nm.  $^1\text{H}$  NMR,  $^{13}\text{C}$  NMR and 2D NMR spectra were recorded at 25°C on a Varian 500 MHz spectrometer,  $^{13}\text{C}$  NMR spectra were recorded at 25°C on a Varian 125 MHz, and TMS as internal standard. The chemical shifts ( $\delta$ ) are given in parts per million relative to internal standard TMS (0 ppm for  $^1\text{H}$ ) and DMSO- $d_6$  (40.0 ppm for  $^{13}\text{C}$ ). The molecular weights of the complexes were obtained by using matrix-assisted laser desorption-ionization time-of-flight (MALDI-TOF) mass spectrometry. Elemental analysis was obtained using a Flash EA1112 analyser. UV-vis absorption spectra were recorded on a Shimadzu UV-3100 spectrophotometer. Photoluminescence spectra were collected on a Shimadzu RF-5301PC spectrophotometer and Maya 2000Pro optical fiber spectrophotometer. PL efficiencies were measured with an integrating sphere (C-701, Labsphere Inc.), with a 365 nm Ocean Optics LLS-LED as the excitation source, and the laser was introduced into the sphere through the optical fiber. The excited-state lifetimes were measured by exciting the samples with 355 nm light pulses with  $\sim 3$  ns pulse width from a Quanty-Ray DCR-2 pulsed Nd:YAG laser. For crystal structures of complexes **1** and **2**, the data were collected on a Bruker Smart Apex II CCD diffractometer with graphite-monochromated Mo  $K\alpha$  radiation ( $\lambda = 0.71073 \text{ \AA}$ ) at room temperature.

## 2. Ancillary ligands, complexes **1** and **2** - synthesis and characterization

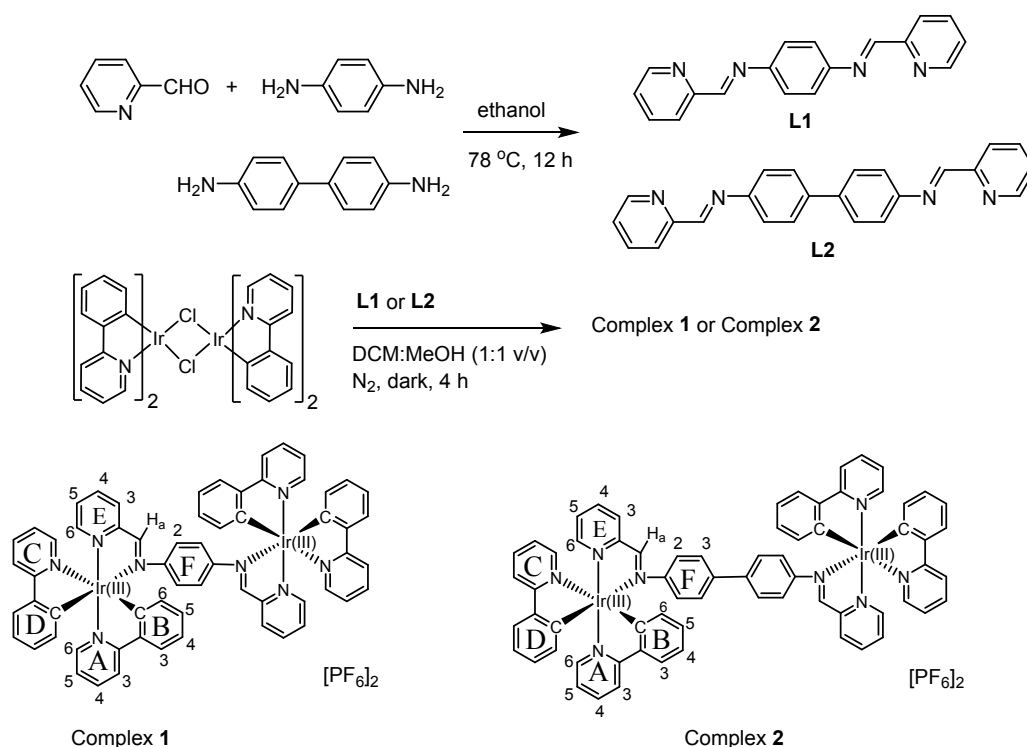

**Scheme S1.** The synthetic routes to the ancillary ligands **L1**, **L2**, and complexes **1** and **2**.

### Synthesis of N<sub>1</sub>,N<sub>4</sub>-bis(pyridin-2-ylmethylene)benzene-1,4-diamine (**L1**)

**L1** was synthesised according to the literature method.<sup>1</sup> 1,4-Diaminobenzene (0.108 g, 1.0 mmol) was dissolved in hot ethanol (10 ml) and 2-formylpyridine (0.214 g, 2.0 mmol) was added to the solution. Then the mixture was refluxed at 78 °C for 12 h. After cooling to room temperature a yellow precipitate quickly formed. The precipitate was then filtered and recrystallised from hot ethanol and dried in vacuo to give **L1**. Yield: 93%. <sup>1</sup>H NMR (500 MHz, CD<sub>2</sub>Cl<sub>2</sub>, δ [ppm]): 8.70 (d, *J* = 5.0 Hz, 2H), 8.66 (s, 2H), 8.20 (d, *J* = 8.0 Hz, 2H), 7.83 (m, 2H), 7.37 (m, 6H). MS: (MALDI-TOF) [*m/z*]: 286.20 (M<sup>+</sup>) (calcd: 286.28). Anal. Calcd. for C<sub>18</sub>H<sub>14</sub>N<sub>4</sub>: C 75.50, H 4.93, N 19.57. Found C 75.53, H 4.91, N 19.56.

### Synthesis of N<sub>4</sub>,N<sub>4'</sub>-bis(pyridin-2-ylmethylene)-[1,1'-biphenyl]-4,4'-diamine (**L2**)

The synthetic procedure was the same as **L1**, except 4,4'-diaminobiphenyl was used instead of 1,4-diaminobenzene. Yield: 92%. <sup>1</sup>H NMR (500 MHz, CD<sub>2</sub>Cl<sub>2</sub>, δ [ppm]): 8.73 (d, *J* = 5.0 Hz, 2H), 8.68 (s, 2H), 8.23 (d, *J* = 8.0 Hz, 2H), 7.83 (t, *J* = 8.0 Hz, 2H), 7.69 (d, *J* = 8.0 Hz, 4H), 7.38 (m, 6H). MS: (MALDI-TOF) [*m/z*]: 362.20 (M<sup>+</sup>) (calcd: 362.23). Anal. Calcd. for C<sub>24</sub>H<sub>18</sub>N<sub>4</sub>: C 75.54, H 5.01, N 15.45. Found C 75.57, H 5.02, N 15.41.

### Synthesis of [(ppy)<sub>2</sub>Ir-(**L1**)-Ir(ppy)<sub>2</sub>] [PF<sub>6</sub>]<sub>2</sub> (complex **1**)

A yellow suspension of the dichloro-bridged diiridium complex [Ir(ppy)<sub>2</sub>Cl]<sub>2</sub> (0.100 g, 0.1 mmol, 1.00 eq.) and **L1** (0.029 g, 0.1 mmol, 1.00 eq.) in MeOH (15 ml) and CH<sub>2</sub>Cl<sub>2</sub> (15 ml) was refluxed under an inert atmosphere of N<sub>2</sub> in the dark for 4 h. The red solution was then cooled to room temperature, and solid ammonium hexafluorophosphate (0.037 g, 0.2 mmol, 2.00 eq.) was added to the solution. The mixture was stirred for 45 min at room temperature and the suspension was then filtered and the precipitate was washed with petroleum ether and dried. The crude product was recrystallised from petroleum ether to yield complex **1** as a red solid (0.117 g, 86% yield). Complex **1** exists in solution as a pair of diastereoisomers. There is a slight excess of one isomer over the other (ca. 1.3:1). The major isomer is arbitrarily designated as α; the minor as β. Where separate signals are visible for the two isomers, they are reported separately, but in each case integrals are quoted relative to the molecular formula for that isomer (i.e. 1H represents one hydrogen for that isomer). <sup>1</sup>H NMR (500 MHz, DMSO-d<sub>6</sub>, δ [ppm]): 9.42 (s, 1H, H<sup>aβ</sup>), 9.38 (s, 1H, H<sup>aα</sup>), 8.48-8.42 (m, 2H, H<sup>E3α+β</sup>), 8.34 (d, *J* = 6.0 Hz, 1H H<sup>C6β</sup>), 8.30-8.26 (m, 4H, H<sup>C3α+β</sup> and H<sup>E4α+β</sup>), 8.22 (d, *J* = 6.0 Hz, 1H, H<sup>A3β</sup>), 8.18 (d, *J* = 6.0 Hz, 1H H<sup>C6α</sup>), 8.12 (d, *J* = 6.0 Hz, 1H, H<sup>A3α</sup>), 8.08 (t, *J* = 9.0 Hz, 1H, H<sup>A4β</sup>), 8.03-7.98 (m, 3H, H<sup>A4α</sup> and H<sup>C4α+β</sup>), 7.91-7.89 (d, *J* = 7.0 Hz, 2H, H<sup>D3α+β</sup>), 7.80-7.78 (m, 2H, H<sup>E6α+β</sup>), 7.77-7.72 (m 2H, H<sup>E5α+β</sup>), 7.65-7.59 (m, 2H, H<sup>B3α+β</sup>), 7.50 (t, *J* = 5.0 Hz, 2H, H<sup>A6α+β</sup>), 7.32-7.26 (m, 2H, H<sup>C5α+β</sup>), 7.23, (t, *J* = 7.5 Hz, 2H, H<sup>A5α+β</sup>), 7.01 (t, *J* = 7.5 Hz, 2H, H<sup>D4α+β</sup>), 6.89 (t, *J* = 7.5 Hz, 2H, H<sup>D5α+β</sup>), 6.85-6.79 (m, 2H, H<sup>B5α+β</sup>), 6.75 (t, *J* = 6.5 Hz, 1H, H<sup>B4β</sup>), 6.70-6.65 (m, 5H, H<sup>F2α+β</sup> and H<sup>B4α</sup>), 6.07 (d, *J* = 7.5 Hz, 2H, H<sup>D6α+β</sup>), 5.97 (d, *J* = 6.0 Hz, 2H, H<sup>B6α+β</sup>). <sup>13</sup>C NMR (DMSO-d<sub>6</sub>, 125 MHz, δ[ppm]): 120.2(C<sup>A3α+β</sup>), 120.4(C<sup>C3α+β</sup>), 122.3(C<sup>B4α+β</sup>), 122.4 (C<sup>B5α+β</sup>), 123.0(C<sup>D4β</sup>), 123.1(C<sup>D4α</sup>), 123.2(C<sup>F2β</sup>), 123.3(C<sup>F2α</sup>), 124.2(C<sup>A5β</sup>), 124.3(C<sup>A5α</sup>), 124.4(C<sup>C5α+β</sup>),

125.0(C<sup>B3α</sup>), 125.1(C<sup>B3β</sup>), 125.5(C<sup>D3α</sup>), 125.6(C<sup>D3β</sup>), 130.0(C<sup>B5β</sup>), 130.7(C<sup>D5α+β</sup>), 130.8(C<sup>E5α+β</sup>), 130.9(C<sup>D6α+β</sup>), 131.2(C<sup>B6α+β</sup>), 131.9(C<sup>E3α+β</sup>), 139.2(C<sup>C4α+β</sup>), 139.3(C<sup>A4α</sup>), 139.4(C<sup>A4β</sup>), 140.2(C<sup>E4α+β</sup>), 143.8(C<sup>B1α</sup>), 143.9(C<sup>B1β</sup>), 144.1(C<sup>D1α+β</sup>), 147.5(C<sup>F1β</sup>), 147.6(C<sup>F1α</sup>), 148.6(C<sup>D2α</sup>), 148.7(C<sup>D2β</sup>), 149.5(C<sup>A6α+β</sup>), 149.7(C<sup>B2α+β</sup>), 150.3(C<sup>E6α+β</sup>), 150.9(C<sup>C6α+β</sup>), 155.8(C<sup>E2α+β</sup>), 166.8(C<sup>C2α+β</sup>), 167.2(C<sup>A2α+β</sup>), 170.6(C<sup>aβ</sup>), 170.8(C<sup>aα</sup>). MS: (MALDI-TOF) [m/z]: 1578.30 (M-PF<sub>6</sub>) (calcd: 1578.24). Anal. Calcd. for C<sub>62</sub>H<sub>46</sub>F<sub>12</sub>Ir<sub>2</sub>N<sub>8</sub>P<sub>2</sub>: C 47.21, H 2.94, N 7.10. Found C 47.24, H 2.90, N 7.11. Crystals for X-ray analysis were obtained by slow evaporation of a dichloromethane-methanol solution of the complex.

### Synthesis of [(ppy)<sub>2</sub>Ir-(L2)-Ir(ppy)<sub>2</sub>] [PF<sub>6</sub>]<sub>2</sub> (complex 2)

The synthesis of complex **2** was similar to that of complex **1** except that the ancillary ligand **L1** was replaced by **L2**. Complex **2** was obtained as a red solid (0.130 g, 88% yield). Only one diastereoisomer is observed in solution. <sup>1</sup>H NMR (500 MHz, DMSO-d<sub>6</sub>, δ [ppm]): 9.68 (s, 1H, H<sup>a</sup>), 8.56 (d, *J* = 7.5 Hz, 1H, H<sup>E3</sup>), 8.44 (d, *J* = 5.0 Hz, 1H, H<sup>C6</sup>), 8.29 (m, 2H, H<sup>C3+E4</sup>), 8.11 (d, *J* = 8.0 Hz, 1H, H<sup>A3</sup>), 7.97 (m, 2H, H<sup>A4+C4</sup>), 7.90 (d, *J* = 8.0 Hz, 1H, H<sup>D3</sup>), 7.82 (d, *J* = 5.0 Hz, 1H, H<sup>E6</sup>), 7.73 (t, *J* = 7.0 Hz, 1H, H<sup>E5</sup>), 7.61 (m, 2H, H<sup>A6+B3</sup>), 7.33 (m, 3H, H<sup>C5+F3</sup>), 7.26 (t, *J* = 6.5 Hz, 1H, H<sup>A5</sup>), 7.01 (m, 2H, H<sup>D4+F2</sup>), 6.86 (t, *J* = 7.0 Hz, 1H, H<sup>D5</sup>), 6.78 (t, *J* = 7.5 Hz, 1H, H<sup>B4</sup>), 6.73 (t, *J* = 7.5 Hz, 1H, H<sup>B5</sup>), 6.09 (d, *J* = 7.0 Hz, 1H, H<sup>D6</sup>), 6.04 (d, *J* = 7.5 Hz, 1H, H<sup>B6</sup>). <sup>13</sup>C NMR (DMSO-d<sub>6</sub>, 125 MHz, δ [ppm]): 120.2(C<sup>A3</sup>), 120.7(C<sup>C3</sup>), 122.2(C<sup>B4</sup>), 123.0(C<sup>D4 or F2</sup>), 123.7(C<sup>D4 or F2</sup>), 124.3(C<sup>A5</sup>), 124.6(C<sup>C5 or F3</sup>), 125.1(C<sup>B3</sup>), 125.5(C<sup>D3</sup>), 127.0(C<sup>C5 or F3</sup>), 130.2(C<sup>B5</sup>), 130.7(C<sup>D5</sup>), 130.8(C<sup>E5</sup>), 131.1(C<sup>D6</sup>), 131.5(C<sup>B6</sup>), 131.8(C<sup>E3</sup>), 138.7(C<sup>F4</sup>), 139.4(C<sup>C4</sup>), 139.4(C<sup>A4</sup>), 140.3(C<sup>E4</sup>), 143.9(C<sup>B1</sup>), 144.1(C<sup>D1</sup>), 147.8(C<sup>F1</sup>), 149.1(C<sup>D2</sup>), 149.9(C<sup>A6</sup>), 150.4(C<sup>E6</sup>), 150.7(C<sup>B2</sup>), 151.3(C<sup>C6</sup>), 156.0(C<sup>E2</sup>), 166.9(C<sup>C2</sup>), 167.4(C<sup>A2</sup>), 170.2(C<sup>a</sup>). MS: (MALDI-TOF) [m/z]: 1654.30 (M-PF<sub>6</sub>) (calcd: 1654.27). Anal. Calcd. for C<sub>68</sub>H<sub>50</sub>F<sub>12</sub>Ir<sub>2</sub>N<sub>8</sub>P<sub>2</sub>: C 49.39, H 3.05, N 6.78. Found C 49.41, H 3.02, N 6.79. Crystals for X-ray analysis were obtained by slow evaporation of a dichloromethane-methanol solution of the complex.

### 3. $^1\text{H}$ NMR and $^{13}\text{C}$ NMR spectra of complexes **1** and **2** at room temperature

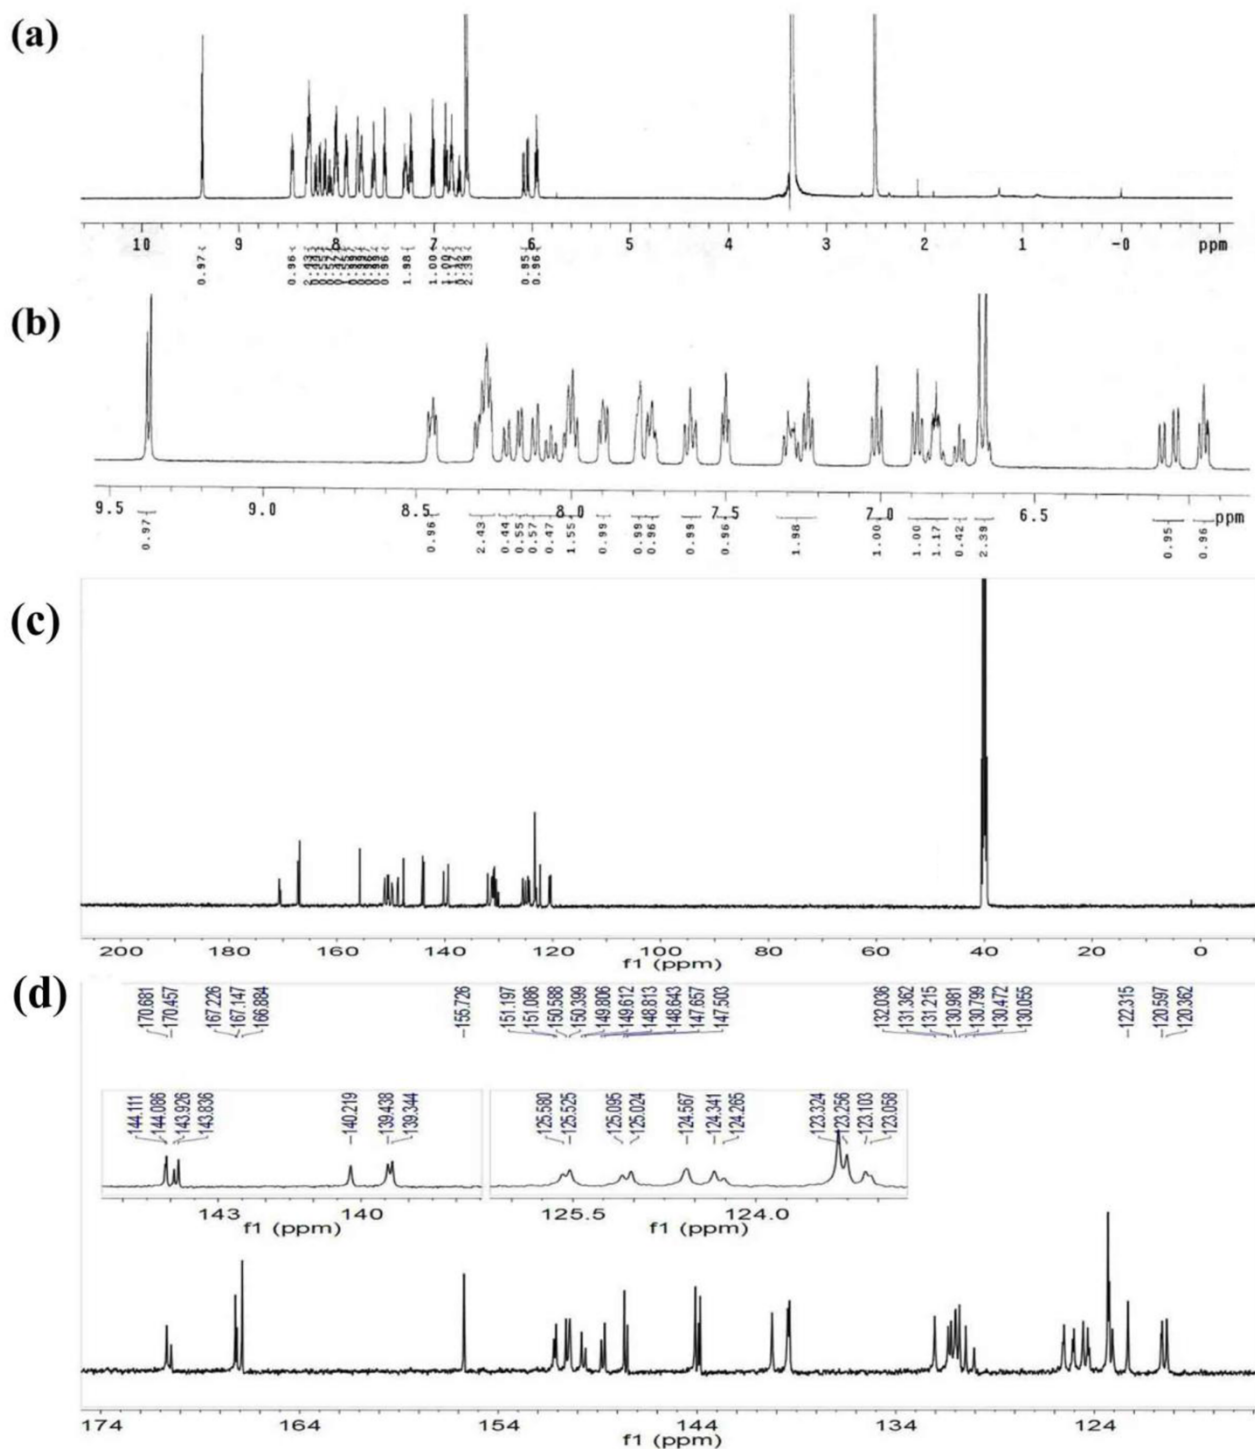

**Fig. S1** (a)  $^1\text{H}$  NMR spectrum of complex **1** in DMSO- $d_6$ . (b) Expansion of the aromatic region for complex **1**. (c)  $^{13}\text{C}$  NMR spectrum of complex **1** in DMSO- $d_6$ . (d) Expansion of the aromatic region for complex **1**.

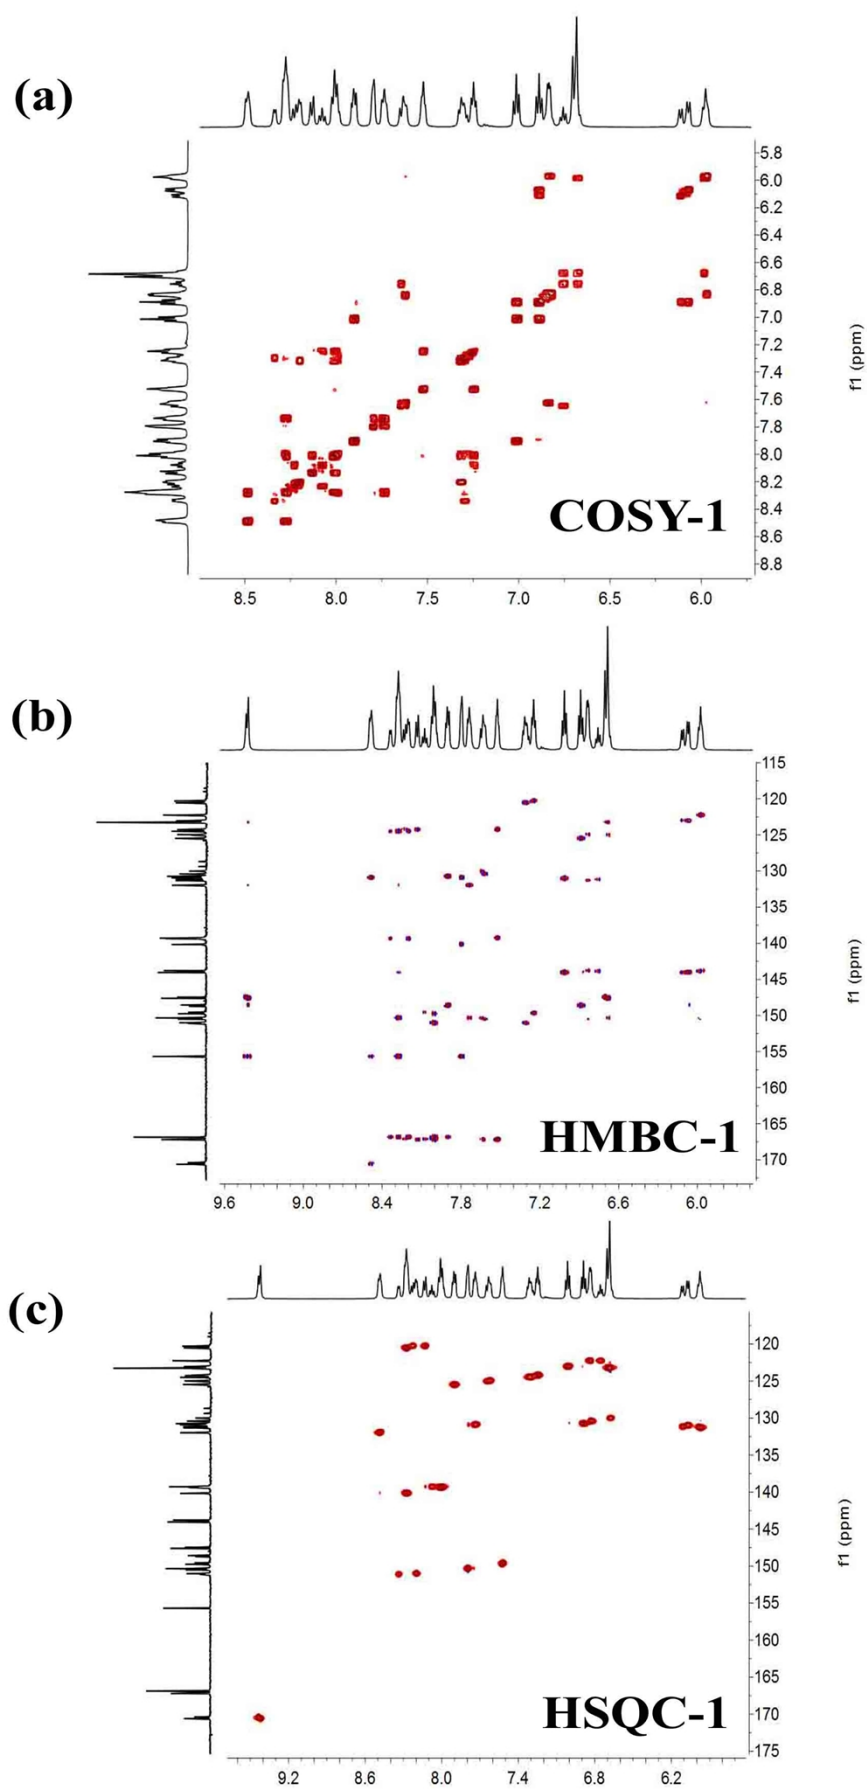

**Fig. S2** (a) 2D COSY NMR spectrum of complex **1** in DMSO- $d_6$ . (b) 2D HMBC

NMR spectrum of complex **1** in DMSO- $d_6$ . (c) 2D HSQC NMR spectrum of complex **1** in DMSO- $d_6$ .

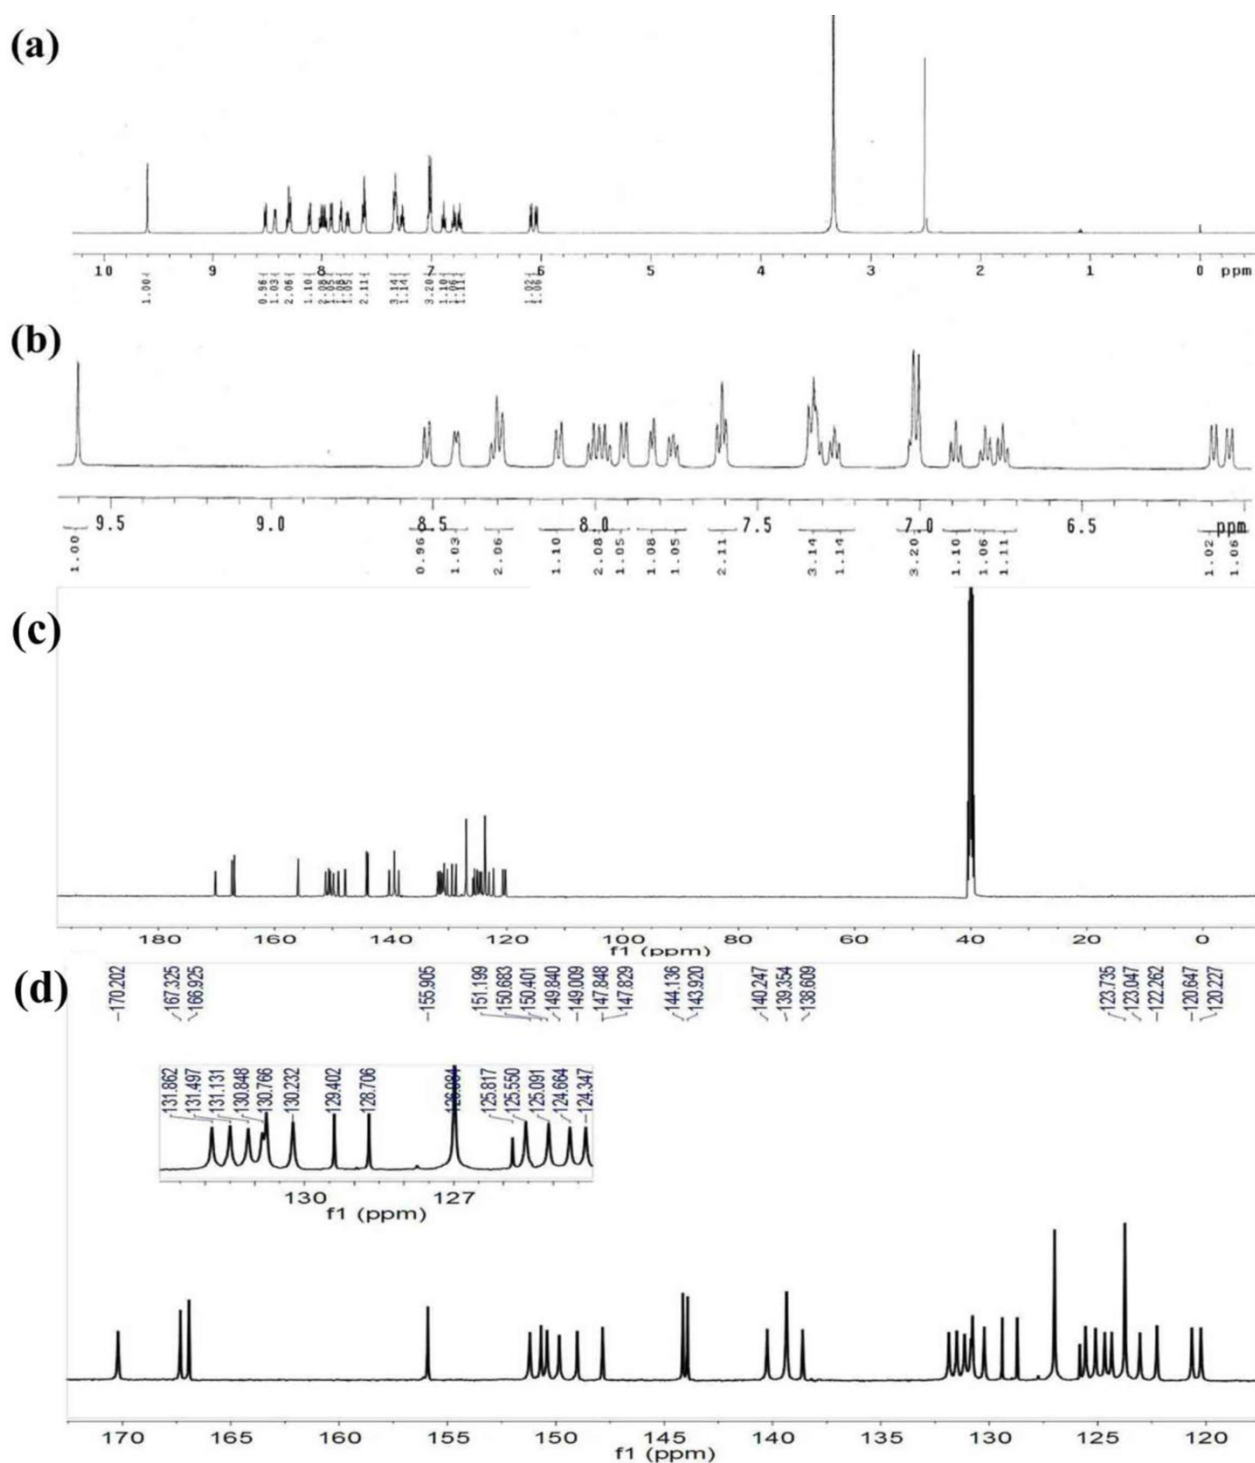

**Fig. S3** (a)  $^1\text{H}$  NMR spectrum of complex **2** in DMSO- $d_6$ . (b) Expansion of the aromatic region for complex **2**. (c)  $^{13}\text{C}$  NMR spectrum of complex **2** in DMSO- $d_6$ . (d) Expansion of the aromatic region for complex **2**.

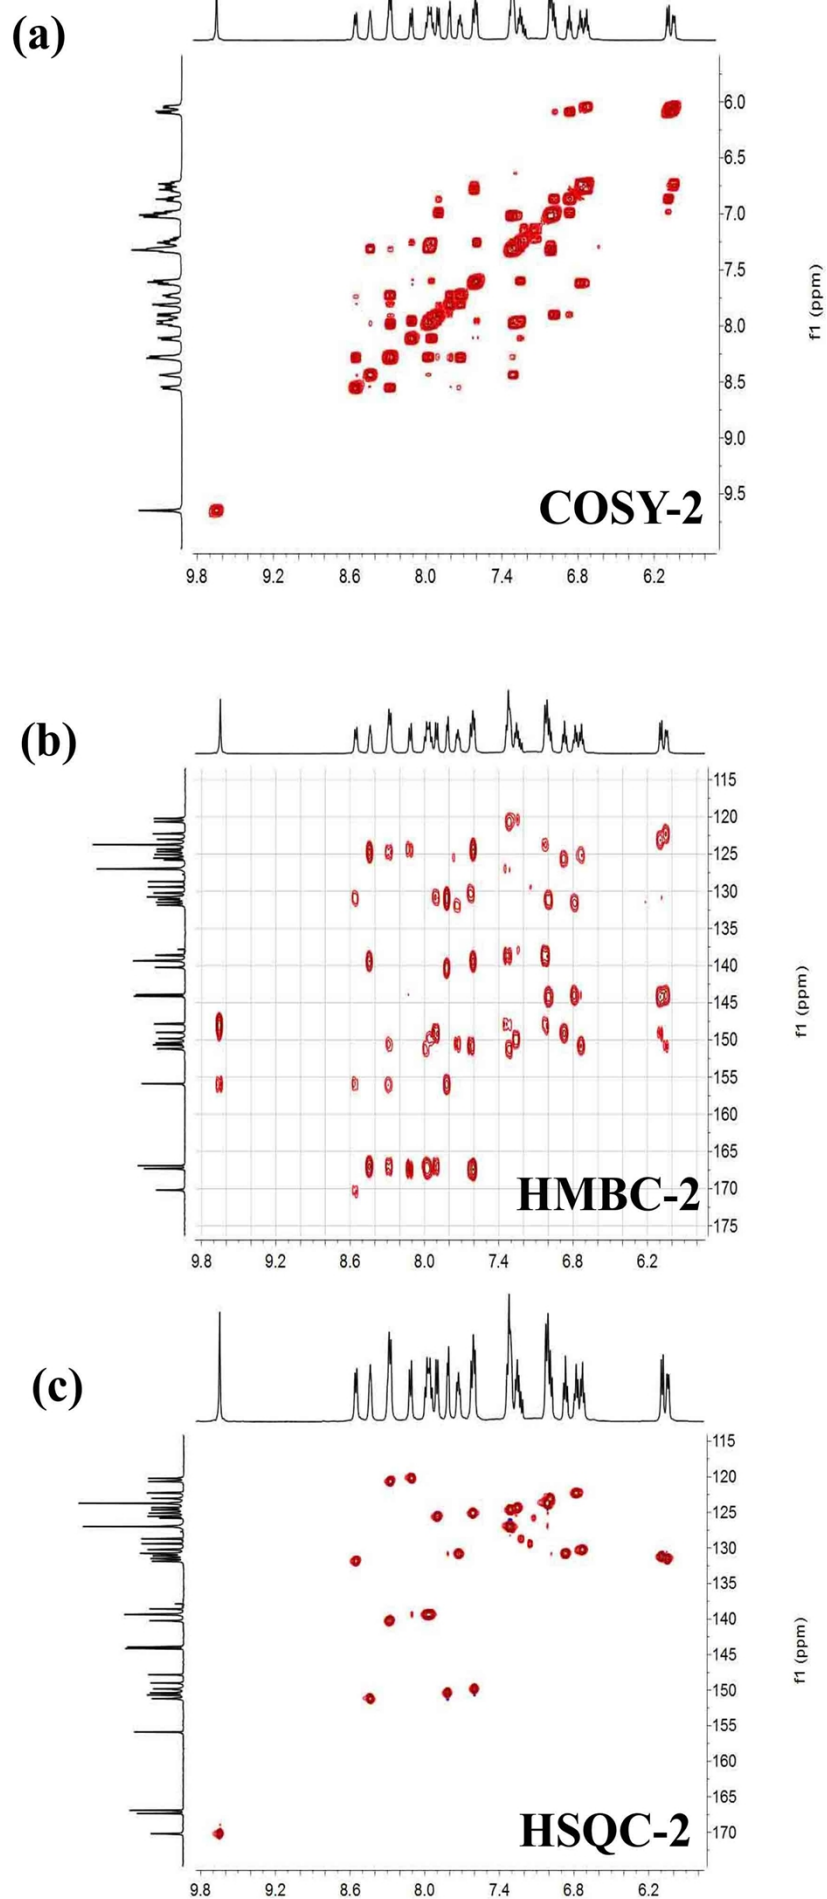

**Fig. S4** (a) 2D COSY NMR spectrum of complex **2** in DMSO- $d_6$ . (b) 2D HMBC NMR spectrum of complex **2** in DMSO- $d_6$ . (c) 2D HSQC NMR spectrum of complex **2** in DMSO- $d_6$ .



#### 4. X-ray crystallography data

The molecular structures of complexes **1** and **2** were confirmed by X-ray crystallographic analysis of single crystals obtained by slow evaporation of a dichloromethane-methanol (3:1 v/v) solution of the complex **2**. Diffraction data were collected on a Bruker SMART Apex CCD diffractometer using k(Mo-K) radiation ( $k = 0.71073 \text{ \AA}$ ). Cell refinement and data reduction were made by the SAINT program. The structure was determined using the SHELXTL/PC program. All non-hydrogen atoms were refined anisotropically, whereas hydrogen atoms were placed at the calculated positions and included in the final stage of refinements with fixed parameters. Fig. S5 shows Oak Ridge thermal ellipsoid plot (ORTEP) drawings of complexes **1** and **2**. The crystallographic data have been deposited with the Cambridge Crystallographic Data Centre with CCDC deposition numbers 976189 and 970289. These data can be obtained free of charge from The Cambridge Crystallographic Data Centre via [www.ccdc.cam.ac.uk/data\\_request/cif](http://www.ccdc.cam.ac.uk/data_request/cif).

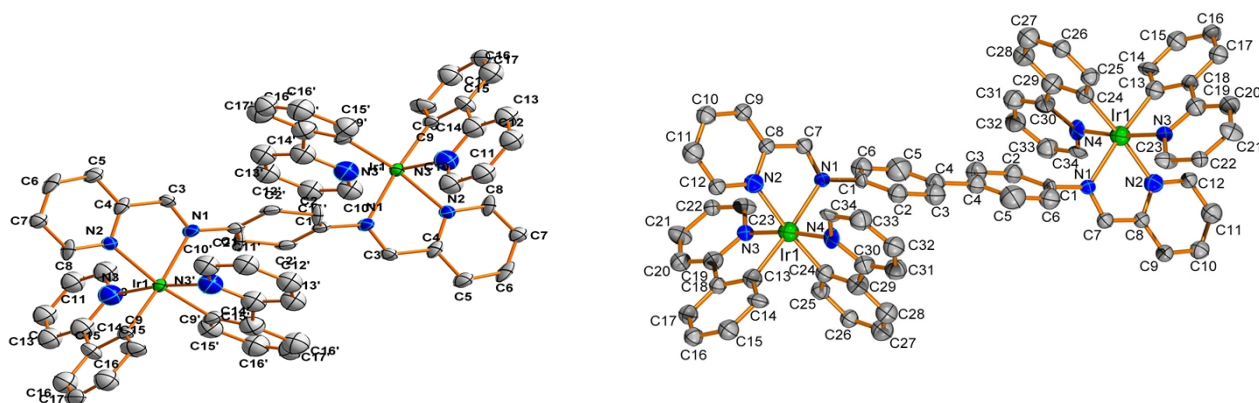

**Fig. S5** The dication in the molecular structures of complexes **1** and **2** in the crystal. The H atoms,  $\text{PF}_6^-$  anions and solvent molecules are omitted for clarity.

**Table S1** Crystal data and structure refinement for complex **1**.

|                   | Complex <b>1</b>                                                         |
|-------------------|--------------------------------------------------------------------------|
| Empirical formula | $\text{C}_{62}\text{H}_{46}\text{F}_{12}\text{Ir}_2\text{N}_8\text{P}_2$ |
| Formula weight    | 1577.41                                                                  |
| Temperature (K)   | 296(2)                                                                   |
| Crystal system    | Orthorhombic                                                             |
| space group       | Cmca                                                                     |
| a / $\text{\AA}$  | 16.075(5)                                                                |
| b / $\text{\AA}$  | 22.454(6)                                                                |
| c / $\text{\AA}$  | 16.949(5)                                                                |
| $\alpha /^\circ$  | 90.000                                                                   |
| $\beta /^\circ$   | 90.000                                                                   |
| $\gamma /^\circ$  | 90.000                                                                   |
| V/ $\text{\AA}^3$ | 6118(3)                                                                  |
| Z                 | 4                                                                        |

|                                           |                |
|-------------------------------------------|----------------|
| $\rho_{\text{calc}}$ (g/cm <sup>3</sup> ) | 1.713          |
| $\mu/\text{mm}^{-1}$                      | 4.481          |
| $R_{\text{int}}$                          | 0.0656         |
| Goodness-of-fit on $F^2$                  | 1.052          |
| $R_1^a, wR_2^b$ [ $I > 2\sigma(I)$ ]      | 0.0583, 0.1607 |
| $R_1, wR_2$ (all data)                    | 0.0832, 0.1772 |

<sup>a</sup>  $R_1 = \Sigma ||F_o| - |F_c|| / \Sigma |F_o|$ . <sup>b</sup>  $wR_2 = \{ \Sigma [w(F_o^2 - F_c^2)^2] / \Sigma [w(F_o^2)^2] \}^{1/2}$

**Table S2** Crystal data and structure refinement for complex **2**.

|                                           | Complex <b>2</b>                                                                              |
|-------------------------------------------|-----------------------------------------------------------------------------------------------|
| Empirical formula                         | C <sub>68</sub> H <sub>50</sub> F <sub>12</sub> Ir <sub>2</sub> N <sub>8</sub> P <sub>2</sub> |
| Formula weight                            | 1653.50                                                                                       |
| Temperature (K)                           | 293(2)                                                                                        |
| Crystal system                            | Monoclinic                                                                                    |
| space group                               | p2(1)/c                                                                                       |
| a / Å                                     | 8.8497(18)                                                                                    |
| b / Å                                     | 29.644(6)                                                                                     |
| c / Å                                     | 13.885(3)                                                                                     |
| $\alpha$ / °                              | 90.000                                                                                        |
| $\beta$ / °                               | 91.47(3)                                                                                      |
| $\gamma$ / °                              | 90.000                                                                                        |
| V / Å <sup>3</sup>                        | 3641.3(13)                                                                                    |
| Z                                         | 2                                                                                             |
| $\rho_{\text{calc}}$ (g/cm <sup>3</sup> ) | 1.508                                                                                         |
| $\mu/\text{mm}^{-1}$                      | 3.768                                                                                         |
| $R_{\text{int}}$                          | 0.0595                                                                                        |
| Goodness-of-fit on $F^2$                  | 1.013                                                                                         |
| $R_1^a, wR_2^b$ [ $I > 2\sigma(I)$ ]      | 0.0546, 0.1316                                                                                |
| $R_1, wR_2$ (all data)                    | 0.0837, 0.1403                                                                                |

<sup>a</sup>  $R_1 = \Sigma ||F_o| - |F_c|| / \Sigma |F_o|$ . <sup>b</sup>  $wR_2 = \{ \Sigma [w(F_o^2 - F_c^2)^2] / \Sigma [w(F_o^2)^2] \}^{1/2}$

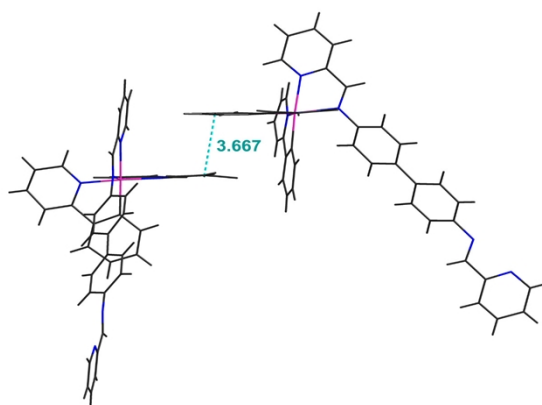

**Fig. S6** Interaction between two molecules of complex **2** in the crystal.

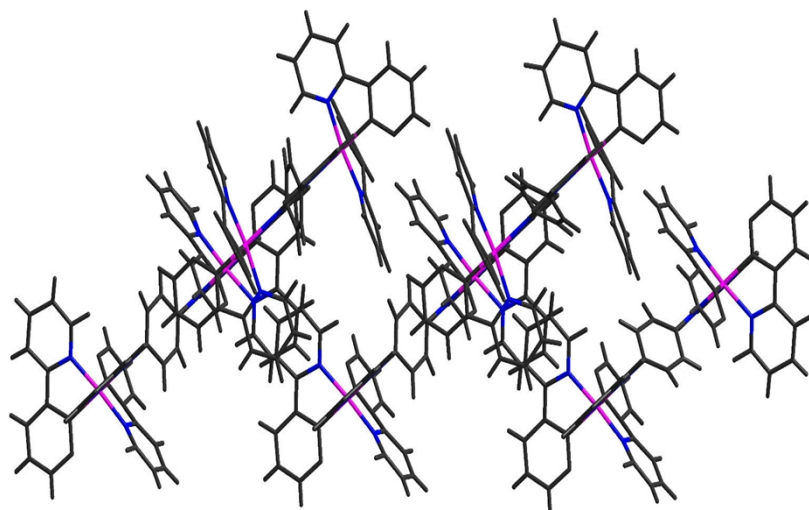

**Fig. S7** Ladder-like double chain structure formed by  $\text{CH}\cdots\pi$  stacking in complex **1** in the crystal.

## 5. Electrochemical data

Electrochemical measurements were performed in anhydrous  $\text{CH}_3\text{CN}$  with a BAS 100 W bioanalytical electrochemical work-station, using Pt as the working electrode, platinum wire as the auxiliary electrode, and a porous glass wick ( $\text{Ag}/\text{Ag}^+$ ) as the reference electrode. The data was standardised against a ferrocene/ferrocenium couple with a scan rate of  $100\text{ mV s}^{-1}$ .

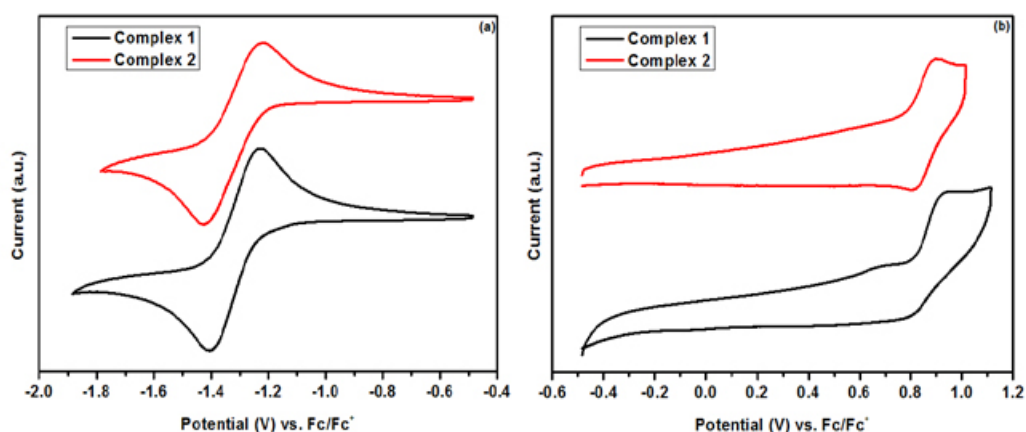

**Fig. S8** Cyclic voltammograms of complexes **1** and **2** measured in acetonitrile in the presence of 0.1 M tetrabutylammonium hexafluorophosphate as supporting electrolyte with  $100\text{ mV/s}$  scan speed. Showing (a) reduction and (b) oxidation waves.

## 6. Photophysical properties

**Table S3** UV-Vis Absorption and Luminescence Data for **1** and **2**.

| Complex  | Solvent (T/K)                         | $\lambda_{\text{abs}}/\text{nm}(\epsilon/10^{-5}\text{M}^{-1}\text{cm}^{-1})$ | $\lambda_{\text{em}}/\text{nm}$ | $\Phi_{\text{L}}^a$ |
|----------|---------------------------------------|-------------------------------------------------------------------------------|---------------------------------|---------------------|
| <b>1</b> | MeCN(298)                             | 252(7835),369 <sub>sh</sub> (2310)                                            | 665                             | 0.00082             |
|          | MeCN(77)                              |                                                                               |                                 |                     |
|          | CH <sub>2</sub> Cl <sub>2</sub> (298) | 253(8510),369 <sub>sh</sub> (2890)                                            |                                 |                     |
| <b>2</b> | MeCN(298)                             | 254(9860),376 <sub>sh</sub> (3670)                                            | 643,699                         | 0.00071             |
|          | MeCN(77)                              |                                                                               |                                 |                     |
|          | CH <sub>2</sub> Cl <sub>2</sub> (298) | 256(9430),380 <sub>sh</sub> (3910)                                            |                                 |                     |

<sup>a</sup> Photoluminescence quantum yield(PLQY) in degassed acetonitrile solution ( $1 \times 10^{-5} \text{ mol}^{-1} \text{ L}^{-1}$ ),  $\lambda_{\text{exc}} = 365 \text{ nm}$ ; error for  $\Phi_{\text{L}} \pm 5\%$ .

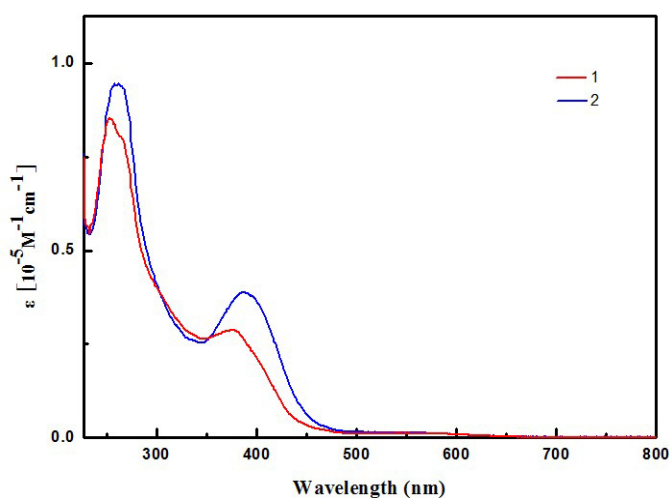

**Fig. S9** UV-Vis absorption spectra of complexes **1** and **2** in CH<sub>2</sub>Cl<sub>2</sub> solution ( $1 \times 10^{-5} \text{ M}$ ) at room temperature.

**Table S4** Emission data ( $\lambda_{\text{max}}$ ) for complexes **1** and **2** in different states (at 298 K).

| Complex  | crystal | powder | film   |
|----------|---------|--------|--------|
| <b>1</b> | 694 nm  | 675 nm | 644 nm |
| <b>2</b> | 724 nm  | 697 nm | 692 nm |

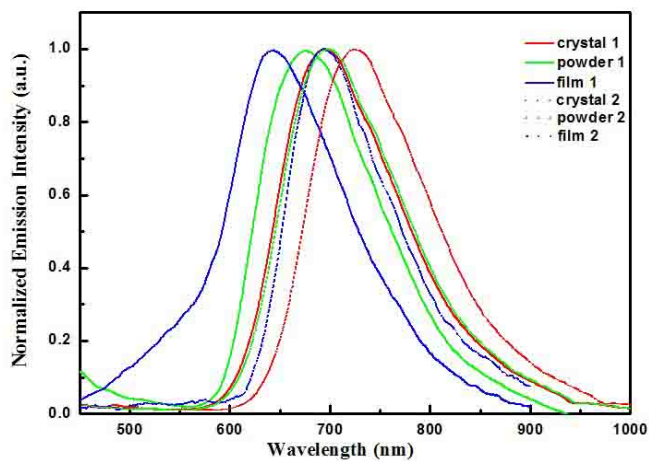

**Fig. S10** Emission spectra of complexes **1** and **2** in different states at room temperature.

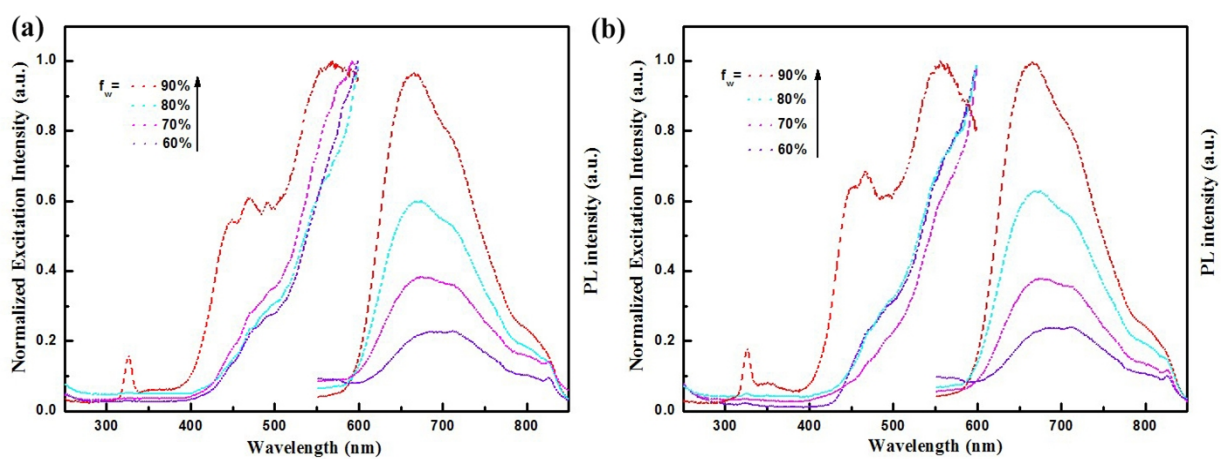

**Fig. S11**  
of  
different  
room

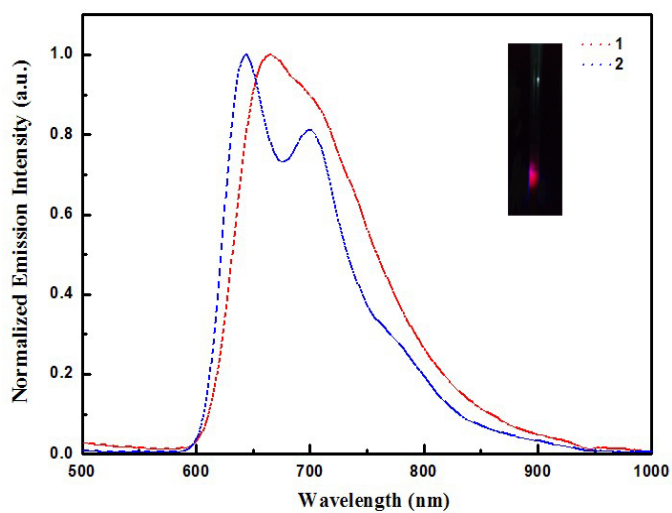

Excitation and emission spectra of complexes **1** (a) and **2** (b) in water/CH<sub>3</sub>CN mixtures with water fractions (60-90% v/v) at room temperature.

**Fig. S12** Emission spectra of complexes **1** and **2** in CH<sub>3</sub>CN solution ( $1 \times 10^{-5}$  M) at 77 K. Inset: A photograph of complex **1** emission in CH<sub>3</sub>CN solution ( $1 \times 10^{-5}$  M) at 77 K under UV light (365 nm) illumination.

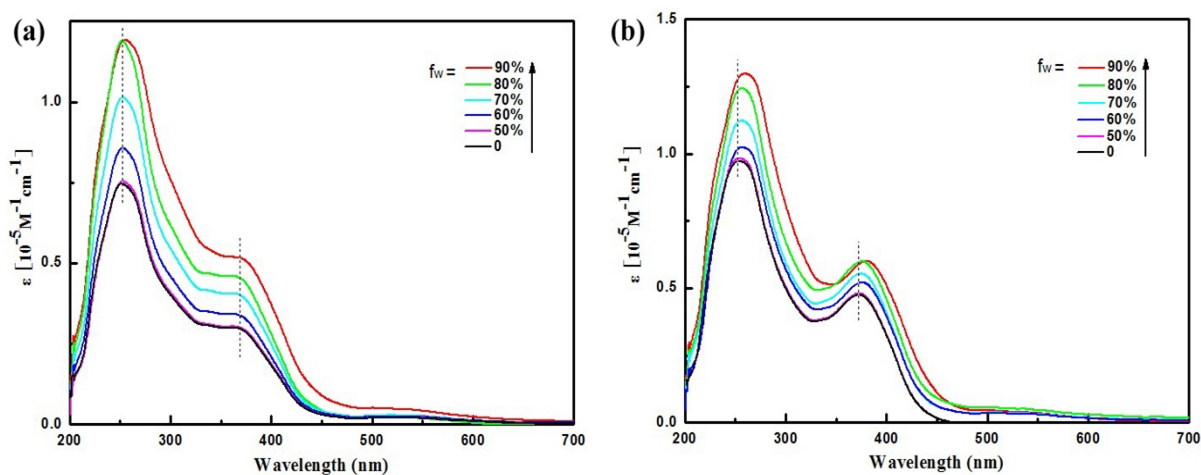

**Fig. S13** (a) UV spectra of **1** (a) and **2** (b) in water–acetonitrile mixtures (concentration of 10  $\mu$ M).

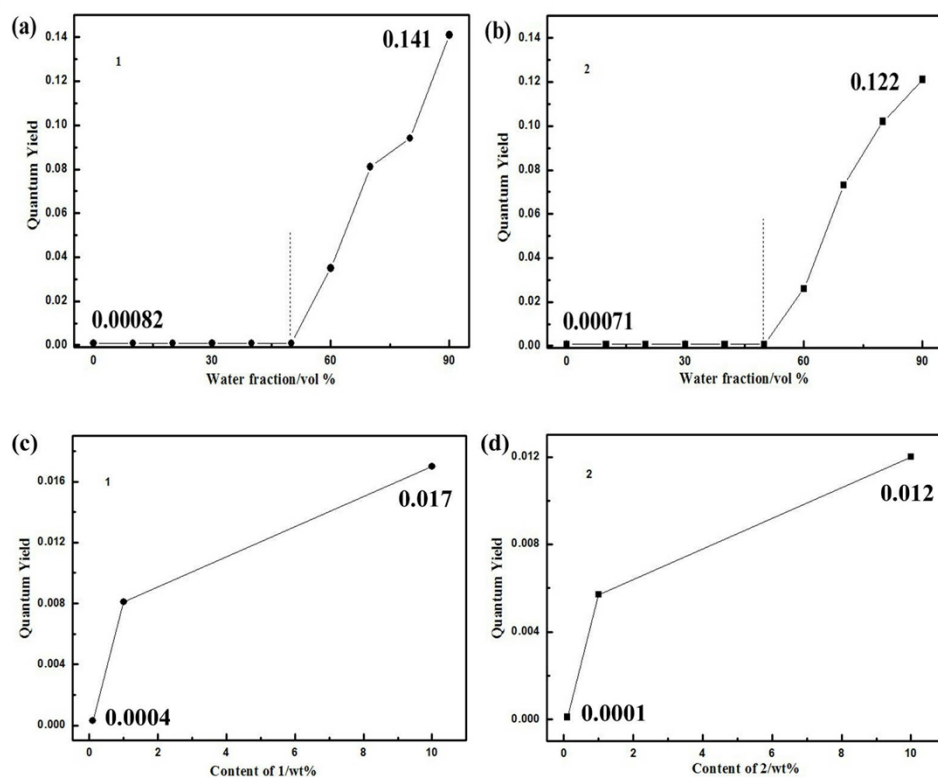

**Fig. S14** (a) PL quantum yields ( $\Phi_L$ ) of complex **1** at  $1 \times 10^{-5}$  M, as a function of water fraction in a CH<sub>3</sub>CN/water mixture (excited at 365 nm). (b) PL quantum yields ( $\Phi_L$ ) of complex **2** at  $1 \times 10^{-5}$  M, as a function of water fraction in a CH<sub>3</sub>CN/water mixture (excited at 365 nm). (c) PL quantum yields ( $\Phi_L$ ) of **1**–PMMA composites (excited at 365 nm). (d) PL quantum yields ( $\Phi_L$ ) of **2**–PMMA composites (excited at 365 nm): error for  $\Phi_L \pm 5\%$ .

## 7. Quantum Chemical Calculations

All calculations were performed with Gaussian 09 program package.<sup>2</sup> The B3LYP functional was employed for all DFT calculations. The 6-31G\* basis set was employed for H, C, N atoms, while the iridium atom was described by the Hay-Wadt effective core potential (ECP) and a double- $\xi$  basis set LANL2DZ. Full geometry optimisation with C1 symmetry constraints was carried out in solution for the singlet ground state ( $S_0$ ) of complex **2**. A solvent effect was taken into account by the polarisable continuum model (PCM) with acetonitrile as solvent. Single point calculations were performed using the crystal structure of complex **2**. TD-DFT with CAM-B3LYP was adopted to investigate the emission properties at the optimised  $T_1$  geometry. From the electron density difference map, the  $T_1$  states of the complexes involve transitions with the mixture of MLCT, LLCT and LC characters.

**Table S5** Selected calculated bond lengths (Å), bond angles (°) and dihedral angles (°) at both optimized  $S_0$  and  $T_1$  geometries for complexes **1** and **2**.

|           | <b>1</b> |        | <b>2</b> |        |
|-----------|----------|--------|----------|--------|
|           | $S_0$    | $T_1$  | $S_0$    | $T_1$  |
| Ir1-C1    | 2.019    | 2.009  | 2.018    | 2.012  |
| Ir1-C2    | 2.025    | 2.007  | 2.024    | 1.997  |
| Ir1-N1    | 2.085    | 2.084  | 2.084    | 2.086  |
| Ir1-N2    | 2.087    | 2.085  | 2.086    | 2.087  |
| Ir1-N3    | 2.306    | 2.300  | 2.230    | 2.230  |
| Ir1-N4    | 2.225    | 2.231  | 2.227    | 2.245  |
| Ir2-C3    | 2.020    | 2.009  | 2.020    | 2.019  |
| Ir2-C4    | 2.024    | 2.007  | 2.023    | 2.023  |
| Ir2-N5    | 2.087    | 2.084  | 2.086    | 2.086  |
| Ir2-N6    | 2.087    | 2.085  | 2.085    | 2.085  |
| Ir2-N7    | 2.289    | 2.296  | 2.288    | 2.295  |
| Ir2-N8    | 2.228    | 2.231  | 2.228    | 2.226  |
| C1-Ir1-C2 | 87.88    | 89.93  | 88.18    | 91.89  |
| C1-Ir1-N2 | 94.08    | 95.41  | 94.21    | 96.57  |
| C2-Ir1-N3 | 102.75   | 103.20 | 102.58   | 104.58 |

|                     |        |        |        |        |
|---------------------|--------|--------|--------|--------|
| N3-Ir1-N2           | 90.91  | 90.95  | 90.95  | 89.80  |
| C1-Ir1-N4           | 95.38  | 92.19  | 95.11  | 88.62  |
| N3-Ir1-N4           | 74.19  | 75.02  | 74.34  | 75.32  |
| C1-Ir1-N3           | 168.91 | 166.22 | 168.75 | 163.12 |
| N4-Ir1-C2           | 175.38 | 175.41 | 175.40 | 174.77 |
| N1-Ir1-N2           | 172.33 | 174.35 | 172.50 | 175.56 |
| C3-Ir2-C4           | 88.45  | 89.93  | 88.53  | 88.27  |
| C3-Ir2-N6           | 93.93  | 95.41  | 94.09  | 94.30  |
| C4-Ir2-N7           | 102.11 | 103.20 | 102.03 | 102.41 |
| N7-Ir2-N6           | 91.38  | 90.95  | 91.19  | 91.02  |
| C3-Ir2-N8           | 95.41  | 92.19  | 95.28  | 95.08  |
| N7-Ir2-N8           | 74.27  | 75.02  | 74.37  | 74.47  |
| C3-Ir2-N7           | 168.88 | 166.22 | 168.88 | 168.76 |
| N8-Ir2-C4           | 174.94 | 175.41 | 175.17 | 175.34 |
| N5-Ir2-N6           | 172.20 | 174.34 | 172.37 | 172.55 |
| C5-N3-C6-<br>C7     | 37.37  | 25.58  | 38.83  | 28.18  |
| C8-N7-C9-<br>C10    | 138.16 | 153.38 | 138.81 | 142.49 |
| C11-C12-<br>C13-C14 |        |        | 141.96 | 148.95 |

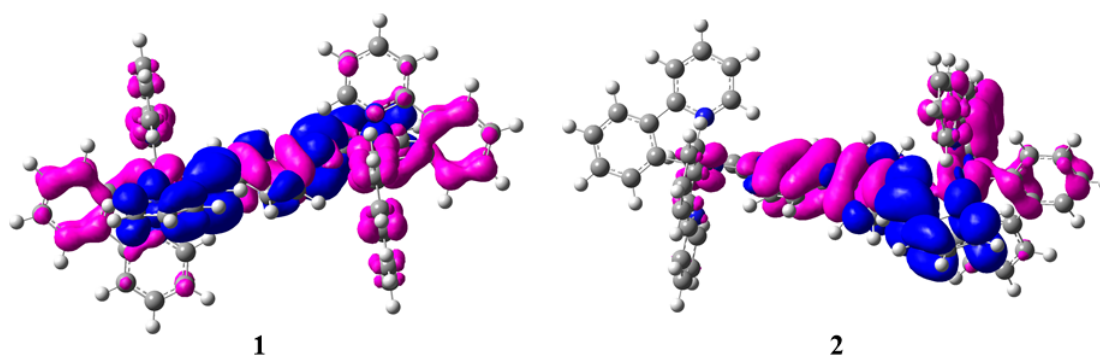

**Fig. S15** Total electron density difference map for **1** and **2** in their  $T_1$  geometries. Purple and blue colors show regions of decrease and increase in electron density, respectively.

## 8. References

1. N. M. Shavaleev, Z. R. Bell. G. Accorsi and M. D. Ward, *Inorg. Chim. Acta*, 2003, **351**, 159–166.
2. M. J. Frisch, G.W. Trucks, H. B. Schlegel, G. E. Scuseria, M. A. Robb, J. R. Cheeseman, G. Scalmani, V. Barone, B. Mennucci, G. A. Petersson, H. Nakatsuji, M. Caricato, X. Li, H. P. Hratchian, A. F. Izmaylov, J. Bloino, G. Zheng, J. L. Sonnenberg, M. Hada, M. Ehara, K. Toyota, R. Fukuda, J. Hasegawa, M. Ishida, T. Nakajima, Y. Honda, O. Kitao, H. Nakai, T. Vreven, J. A. Montgomery, Jr., J. E. Peralta, F. Ogliaro, M. Bearpark, J. J. Heyd, E. Brothers, K. N. Kudin, V. N. Staroverov, R. Kobayashi, J. Normand, K. Raghavachari, A. Rendell, J. C. Burant, S. S. Iyengar, J.



---

Tomasi, M. Cossi, N. Rega, J. M. M. Millam, M. Klene, J. E. K. Knox, J. B. C. Cross, V. Bakken, C. Adamo, J. Jaramillo, R. Gomperts, R. E. Stratmann, O. Yazyev, A. J. Austin, R. Cammi, C. Pomelli, J. W. Ochterski, R. L. Martin, K. Morokuma, V. G. Zakrzewski, G. A. Voth, P. Salvador, J. J. Dannenberg, S. Dapprich, A. D. Daniels, O. Farkas, J. B. Foresman, J. V. Ortiz, J. Cioslowski and D. J. Fox, Gaussian 09, Revision A.02, Gaussian, Inc, Wallingford CT, 2009.
